# Supplementary material
Source: PubMed Central journal article supplement (PMC2612001)
Supplement: NIHMS56223-supplement-suppFig.pdf [file NIHMS56223-supplement-suppFig.pdf]

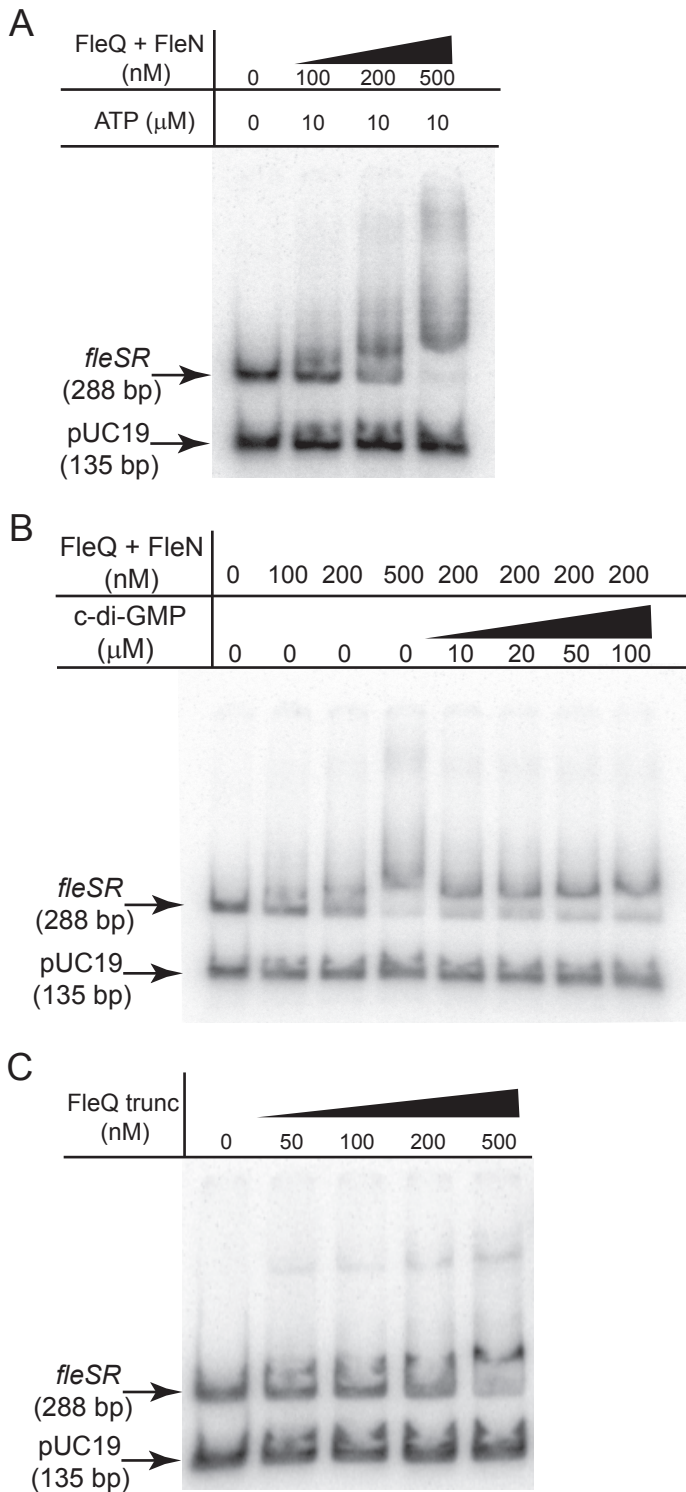

Supplementary Figure 1. Binding of FleQ, FleN, and truncated FleQ to the *fleSR* promoter in the presence and absence of c-di-GMP. A) Binding of FleQ and FleN to the *fleSR* promoter in the presence of ATP, B) Binding of FleQ and FleN to the *fleSR* promoter in the presence and absence of c-di-GMP, C) Binding of truncated FleQ to the *fleSR* promoter. All reactions contained 10  $\mu$ M ATP.
